# Supplementary material for: Suppression of autoimmune demyelinating disease by preferential stimulation of CNS-specific CD8 T cells using Listeria-encoded neuroantigen
Source: Sci Rep. 2017 May 8;7:1519. doi: 10.1038/s41598-017-01771-8 (PMC5431563; doi:10.1038/s41598-017-01771-8)

## SUPPLEMENTARY MATERIALS

### **Suppression of autoimmune demyelinating disease by preferential stimulation of CNS-specific CD8 T cells using Listeria-encoded neuroantigen**

Farah R. Itani<sup>1,3</sup>, Sushmita Sinha<sup>1</sup>, Ashley Brate<sup>1,3</sup>, Lecia L. Pewe<sup>2</sup>, Katherine N. Gibson-Corley<sup>1</sup>, John T. Harty<sup>1,2,3</sup>, and Nitin J. Karandikar<sup>1,3,\*</sup>

From the <sup>1</sup>Department of Pathology, <sup>2</sup>Department of Microbiology, and the <sup>3</sup>Interdisciplinary Graduate Program in Immunology, University of Iowa, 200 Hawkins Dr., Iowa City, IA 52242

\* Corresponding Author

Nitin Karandikar, MD, PhD  
Department of Pathology,  
University of Iowa Health Care  
200 Hawkins Drive, C660 GH,  
Iowa City, IA 52241  
United States

*E-mail address:* [nitin-karandikar@uiowa.edu](mailto:nitin-karandikar@uiowa.edu)

## Supplementary Figure Legends:

**Figure S1.** Vector used to create recombinant *Listeria* expressing PLP175-194, adapted from *Lauer et. al.* The CNS peptide sequence was inserted between the *Bam*HI and *Pst*I restriction sites.

**Figure S2. Peptide dose-response identifies PLP-specific CD8 T cells at various stimulatory concentrations.** Intracellular cytokine staining was performed on bulk splenocytes harvested from LM-PLP infected B6 mice on d7 post infection. Splenocytes were left unstimulated, or stimulated with either OVA257-264 or varying concentrations of PLP178-191. Flow plots show antigen-specific IFN- $\gamma$  production by CD8 (top panels) and CD4 (bottom panels) T cells.

**Figure S3. LM-PLP infection of SJL/J mice leads to attenuation of EAE.** Female 6-8 wk old SJL/J mice were infected with LM-PLP or LM-OVA on d-7 and immunized with PLP178-191/CFA on d0 and monitored for clinical disease. Data are representative of three independent experiments with at least seven mice per group per experiment. \* $p < 0.05$ , \*\*\* $p < 0.001$ .

**Figure S4. Histological analysis of the spinal cord reveals less inflammation in LM-PLP infected animals immunized with PLP178-191/CFA.**

H&E staining of lumbar spinal cord from infected and immunized B6 mice on d18 post-immunization depicts differences in inflammation (thick arrows) and axonal sheath swelling (thin arrows). Data are representative of at least two independent experiments.

Figure S1

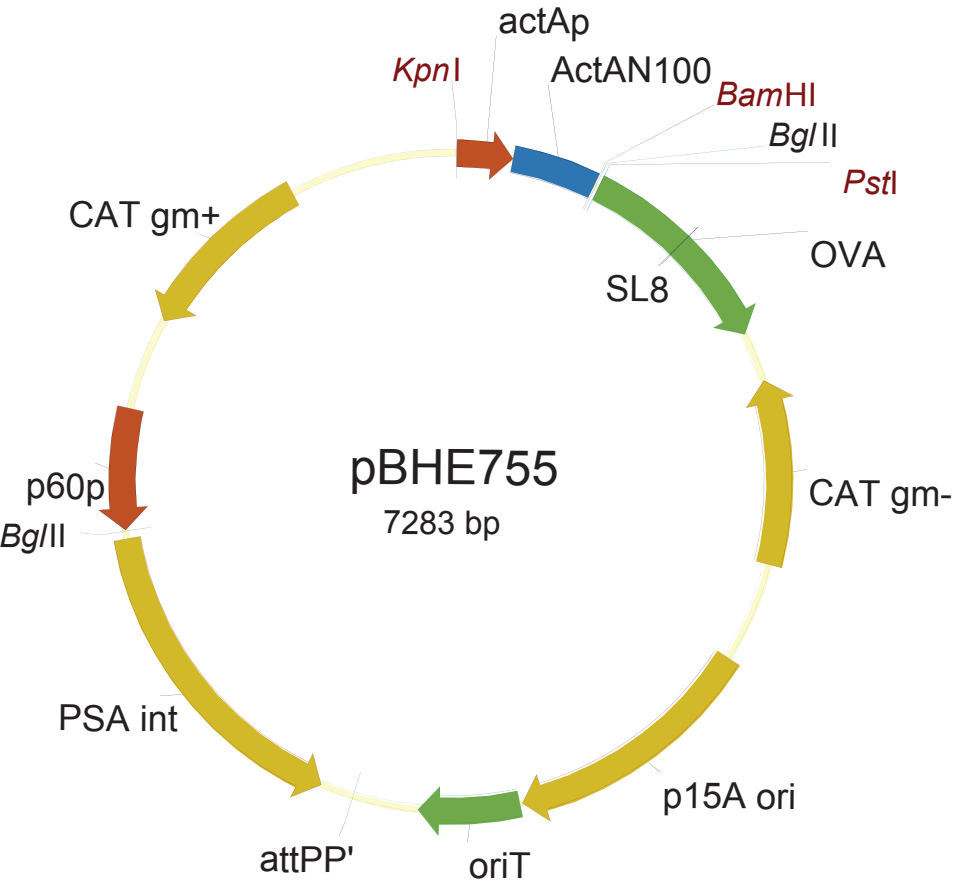

Figure S2

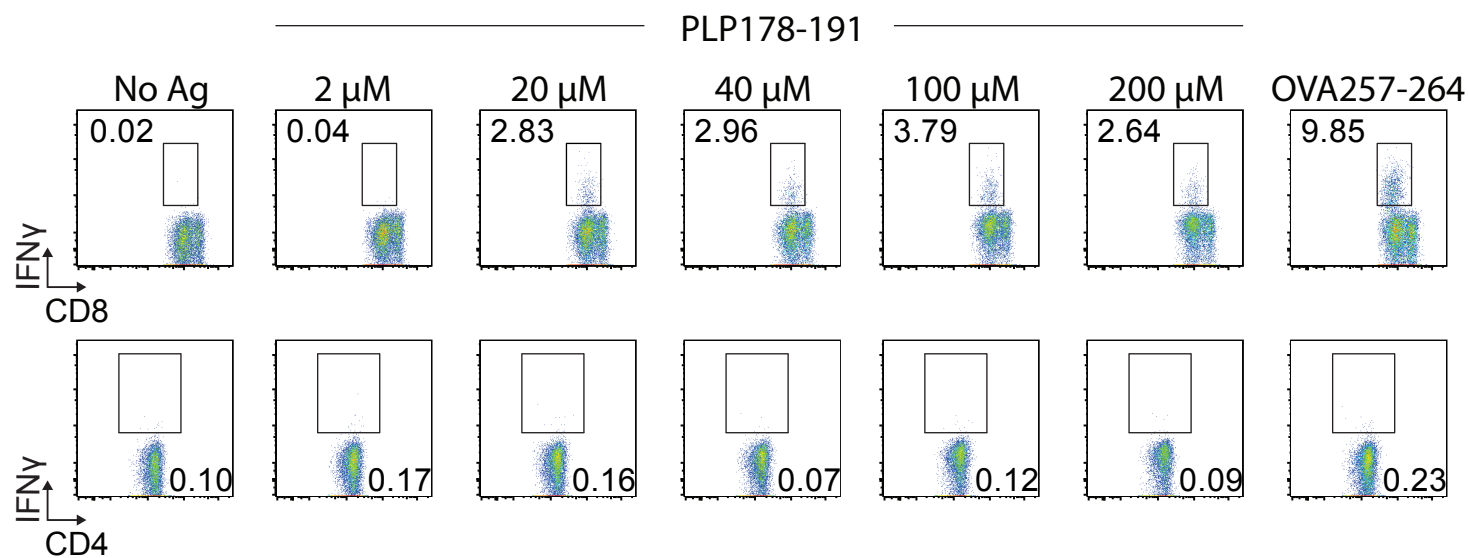

Figure S3

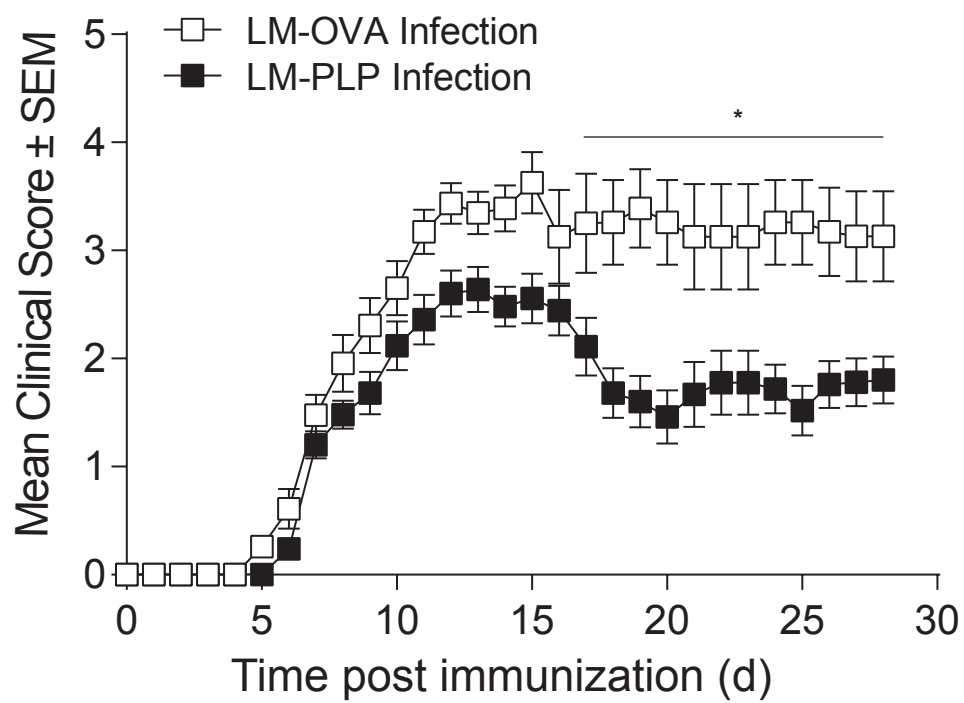

| Infection    | Onset         | Peak***        | Mortality*** | CDI ***         |
|--------------|---------------|----------------|--------------|-----------------|
| LMOVA121-386 | 6.6 $\pm$ 1.2 | 4.2 $\pm$ 0.9  | 12/23        | 62.0 $\pm$ 22.9 |
| LMPLP175-194 | 7.0 $\pm$ 0.8 | 3.24 $\pm$ 0.8 | 2/25         | 39.0 $\pm$ 16.4 |

Figure S4

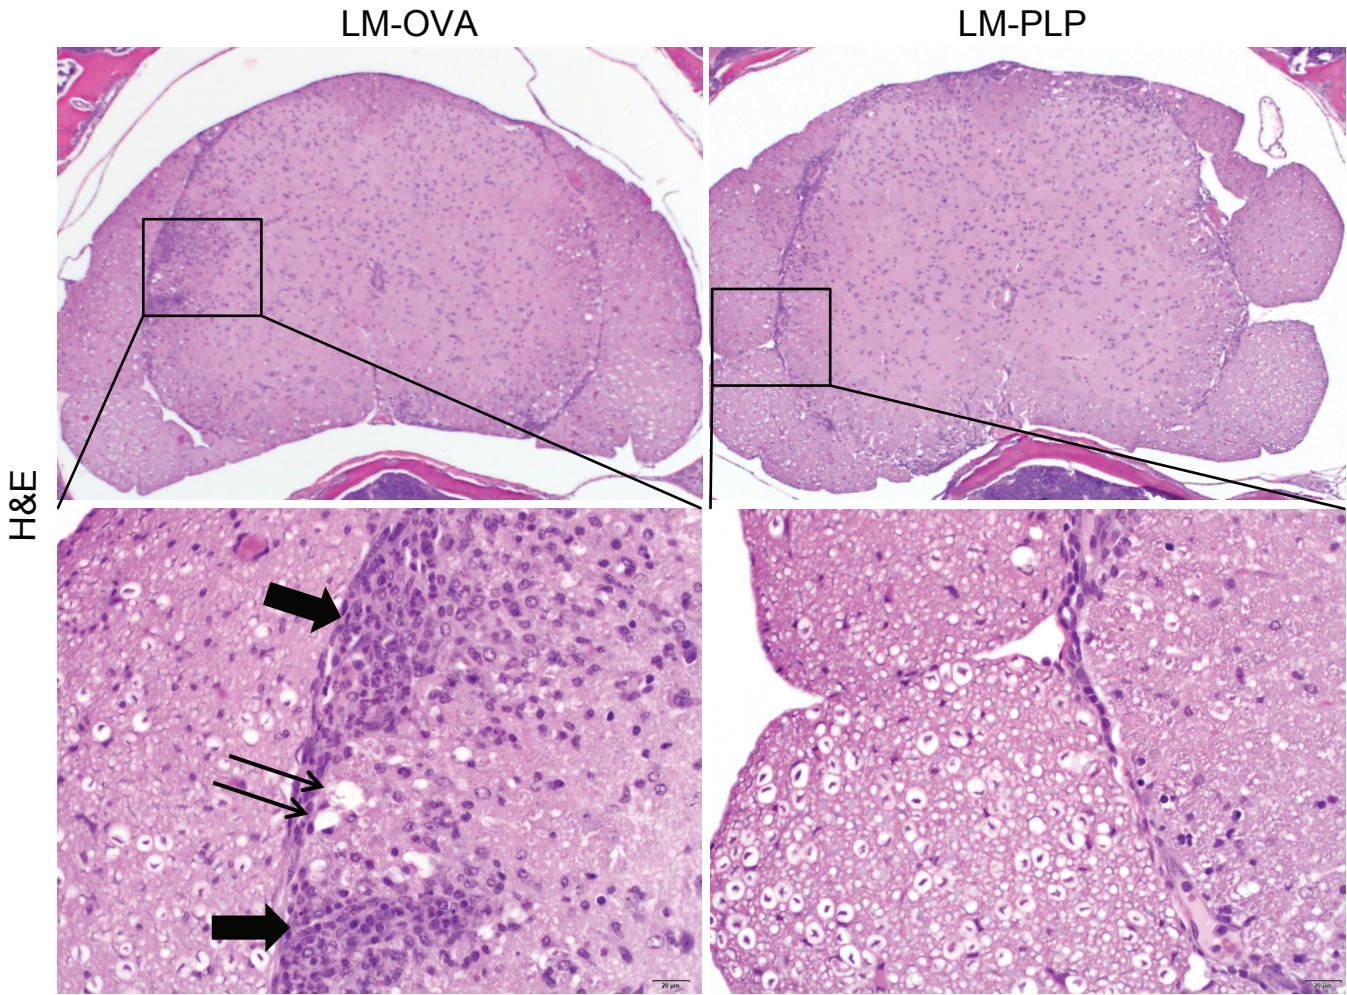

Supplement: Supplementary file 1 — Supplementary Figures [file 41598_2017_1771_MOESM1_ESM.pdf]
